# Supplementary material for: Nitrogen-doped tubular carbon foam electrodes for efficient electroreduction of CO2 to syngas with potential-independent CO/H2 ratios
Source: Royal Society of Chemistry journal article supplement (doi:10.1039/c9ta05904k), 2019-01-01
Supplement: c9ta05904k1.pdf [file c9ta05904k1.pdf]

# Supporting Information

## Nitrogen-Doped Tubular Carbon Foams for Efficient Electroreduction of CO<sub>2</sub> to Syngas with Potential-Independent CO/H<sub>2</sub> Ratios

Hongqiang Li,<sup>a</sup> Nan Xiao,<sup>\*a</sup> Yuwei Wang,<sup>a</sup> Chen Li,<sup>a</sup> Xuan Ye,<sup>c</sup> Zhen Guo,<sup>a</sup> Xin Pan,<sup>a</sup>

Chang Liu,<sup>a</sup> Jinpeng Bai,<sup>a</sup> Jian Xiao,<sup>a</sup> Xiaoyu Zhang,<sup>a</sup> Shijia Zhao<sup>a</sup> and Jieshan Qiu<sup>\*a b</sup>

<sup>a.</sup> *State Key Lab of Fine Chemicals, School of Chemical Engineering,  
Liaoning Key Lab for Energy Materials and Chemical Engineering, PSU-DUT  
Joint Center for Energy Research, Dalian University of Technology, Dalian  
116024, China.*

<sup>b.</sup> *College of Chemical Engineering, Beijing University of Chemical  
Technology, Beijing 100029, China.*

<sup>c.</sup> *Institute of Chemical Engineering, Dalian University of Technology,  
Dalian 116024, China.*

*E-mail: nxiao@dlut.edu.cn (N. Xiao)      jqiu@dlut.edu.cn (J. Qiu)*

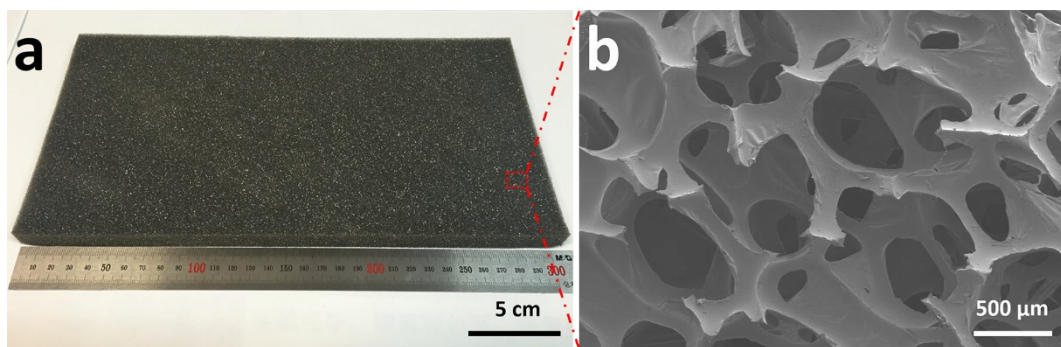

**Figure S1.** Optical image (a) and FESEM image (b) of the pristine PU foam.

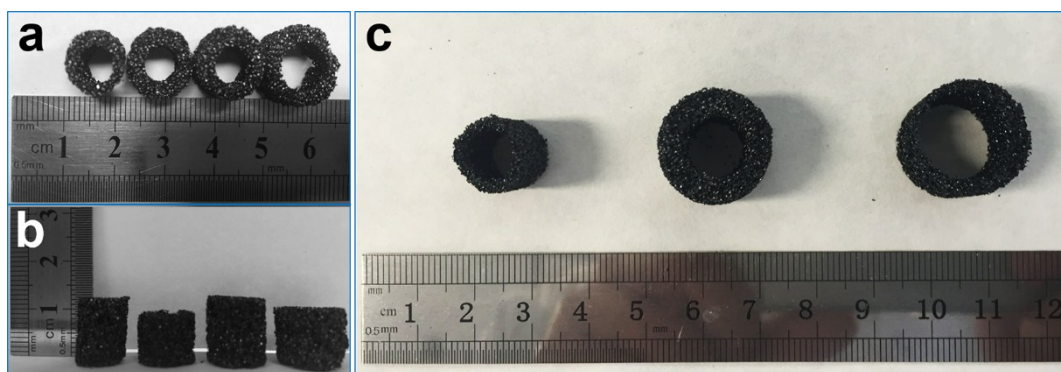

**Figure S2.** Photographs of the various 3D N-doped tubular carbon foam electrodes. (a) top-view. (b) side-view. (c) 3D N-doped tubular carbon foam electrodes with different diameters.

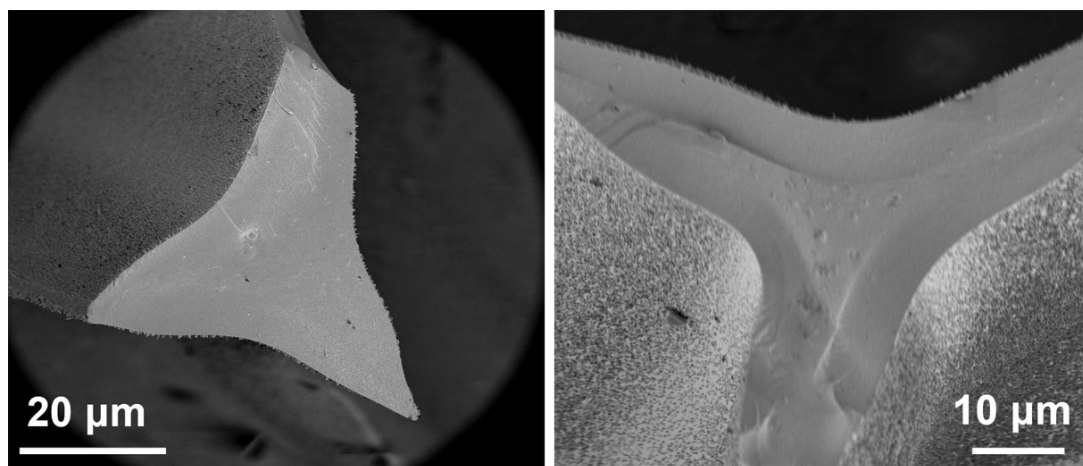

**Figure S3.** Cross-section view of the 3D carbon skeletons.

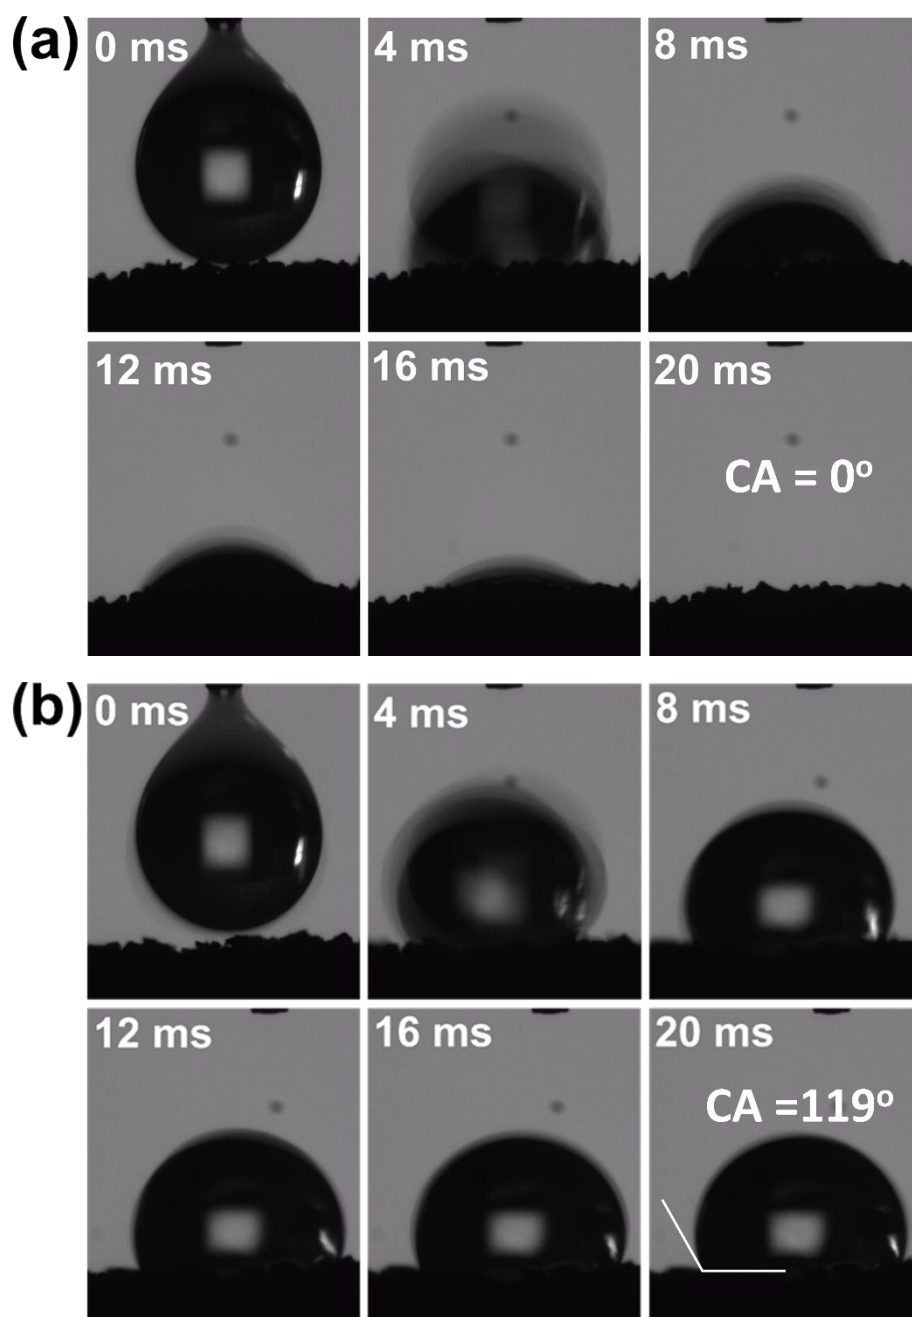

**Figure S4.** Measurements of the wettability of carbon foams. (a) Time-lapse images of a water droplet sinking in the N-doped carbon foam surface. (b) Time-lapse images of a water droplet resting on the pristine carbon foam surface.

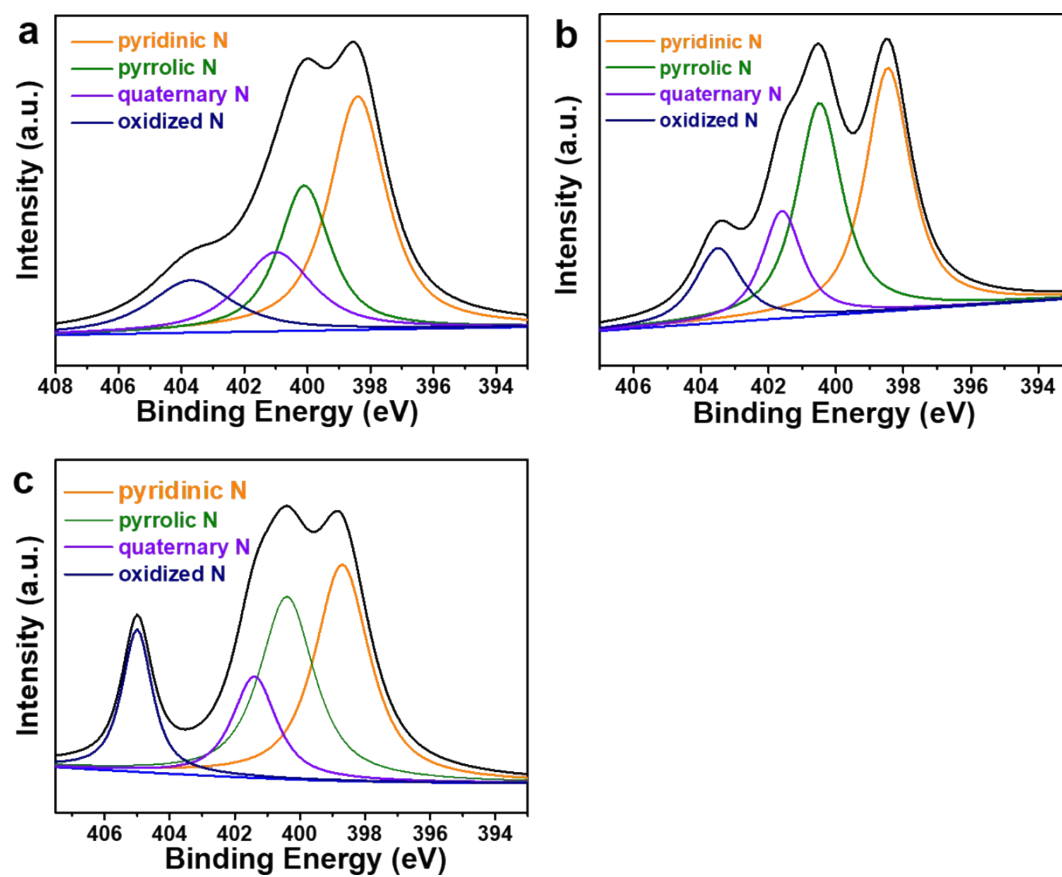

**Figure S5.** The high-resolution XPS spectra of N 1s of CF-30 (a), CF-60 (b), and CF-90 (c).

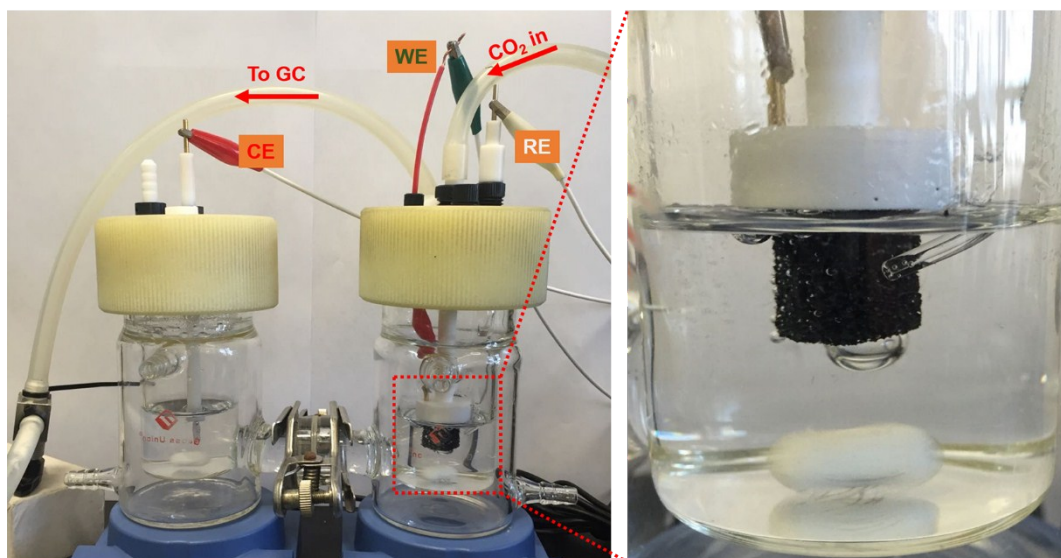

**Figure S6.** The tubular electrode assembled by N-doped carbon foam.

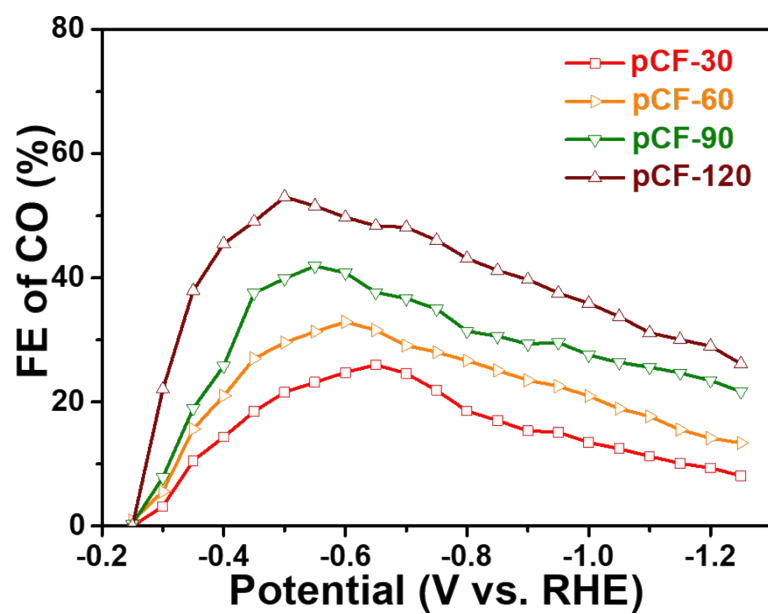

**Figure S7.** The FE of CO on various planar electrodes at different applied potentials.

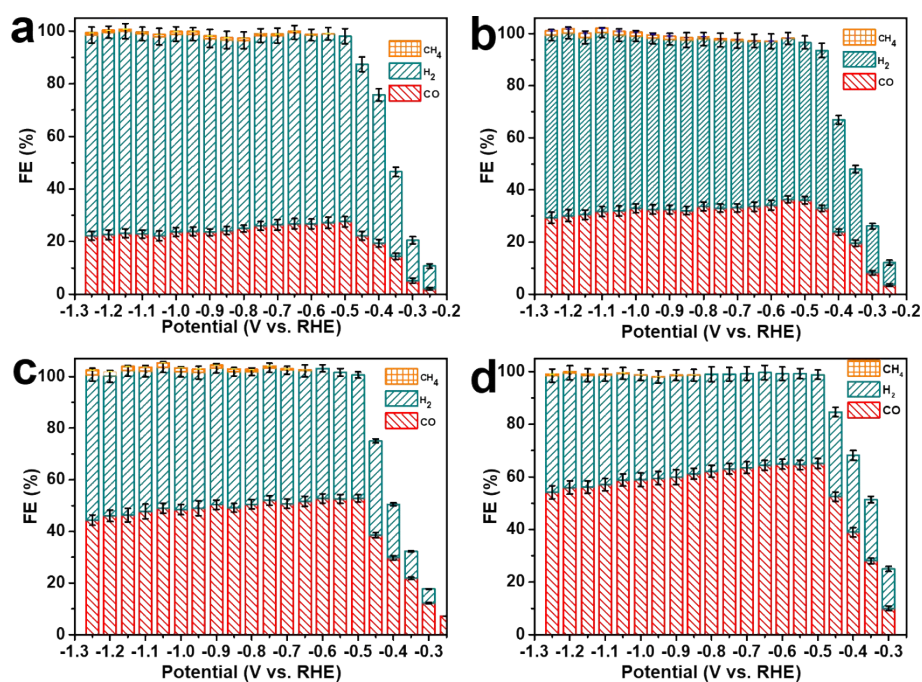

**Figure S8.** FEs of gaseous products on various N-doped tubular carbon foam electrodes at different applied potentials. (a) CF-30. (b) CF-60. (c) CF-90. (d) CF-120.

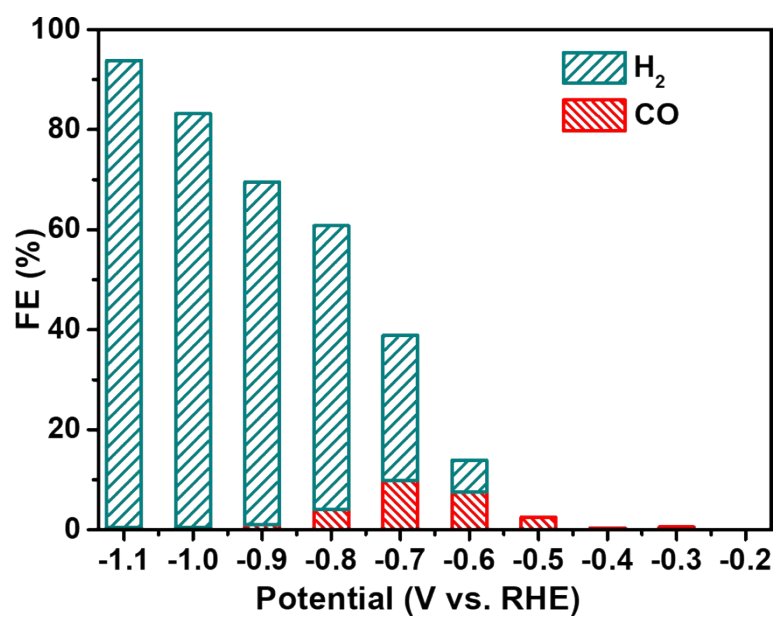

**Figure S9.** FEs of gaseous products on pristine CF.

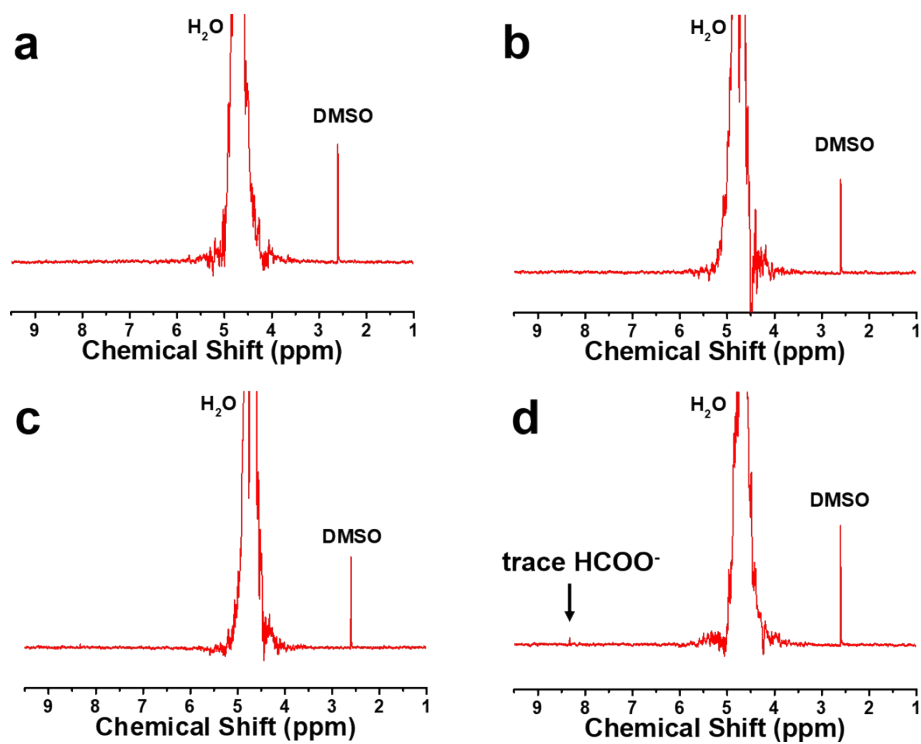

**Figure S10.**  $^1\text{H}$ -NMR spectra of the electrolyte after 4 h  $\text{CO}_2$  reduction electrolysis at -0.60 V vs. RHE for CF-30 (a), CF-60 (b), CF-90 (c), and CF-120 (d).

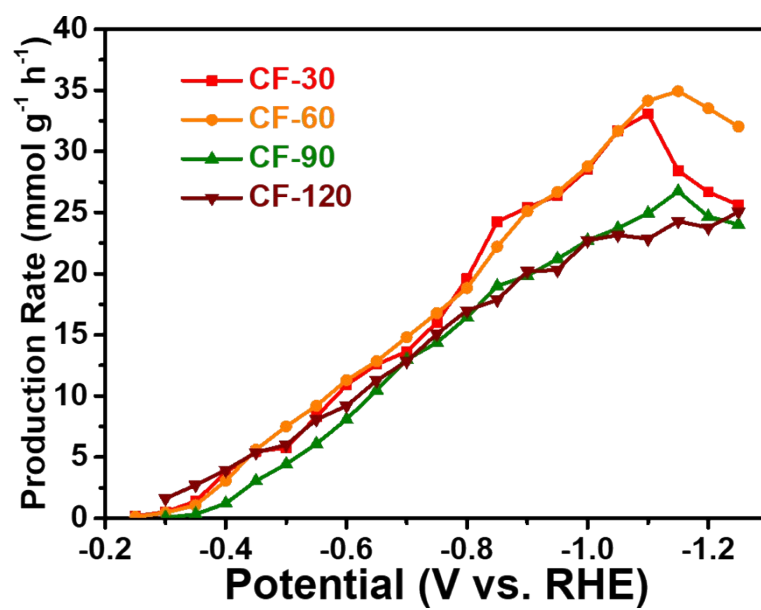

**Figure S11.** H<sub>2</sub> production rates of various samples at different applied potentials.

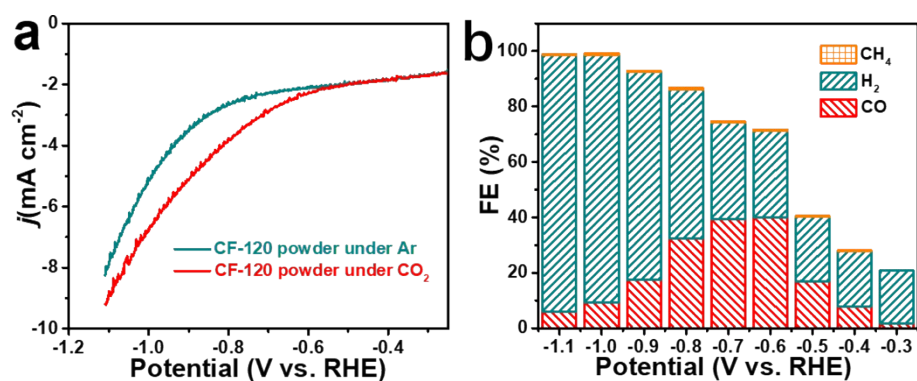

**Figure S12.** Performance of CF-120 powder catalyst (catalyst loading: 0.8 mg cm<sup>-2</sup>). (a) Linear sweep voltammetric curves in the Ar (blue line) or CO<sub>2</sub>-saturated (red line) 0.1 M KHCO<sub>3</sub> aqueous solutions with a 20 mV s<sup>-1</sup> scan rate. (b) FEs of gaseous products.

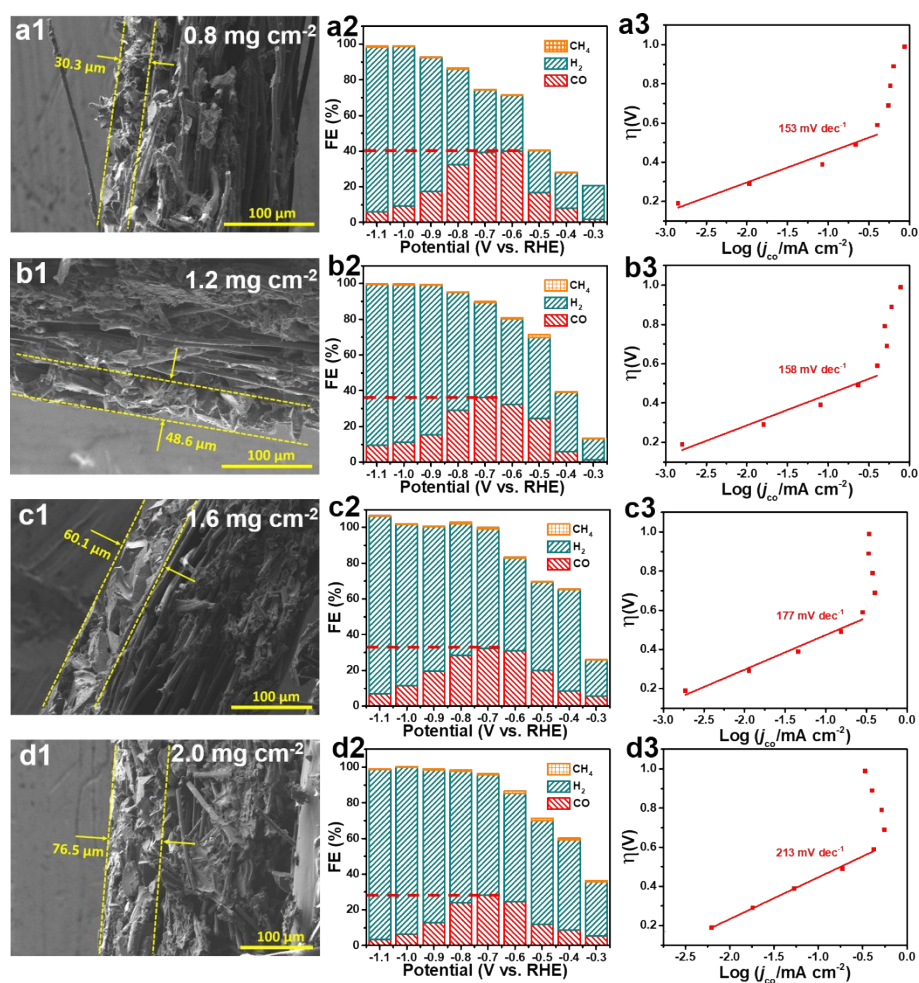

**Figure S13.** The cross-sectional FESEM images (a1, b1, c1, d1), FEs of gaseous products (a2, b2, c2, d2) and Tafel plots (a3, b3, c3, d3) of the CF-120 powder electrodes with different catalyst loadings (a:  $0.8 \text{ mg cm}^{-2}$ , b:  $1.2 \text{ mg cm}^{-2}$ , c:  $1.6 \text{ mg cm}^{-2}$ , d:  $2.0 \text{ mg cm}^{-2}$ ).

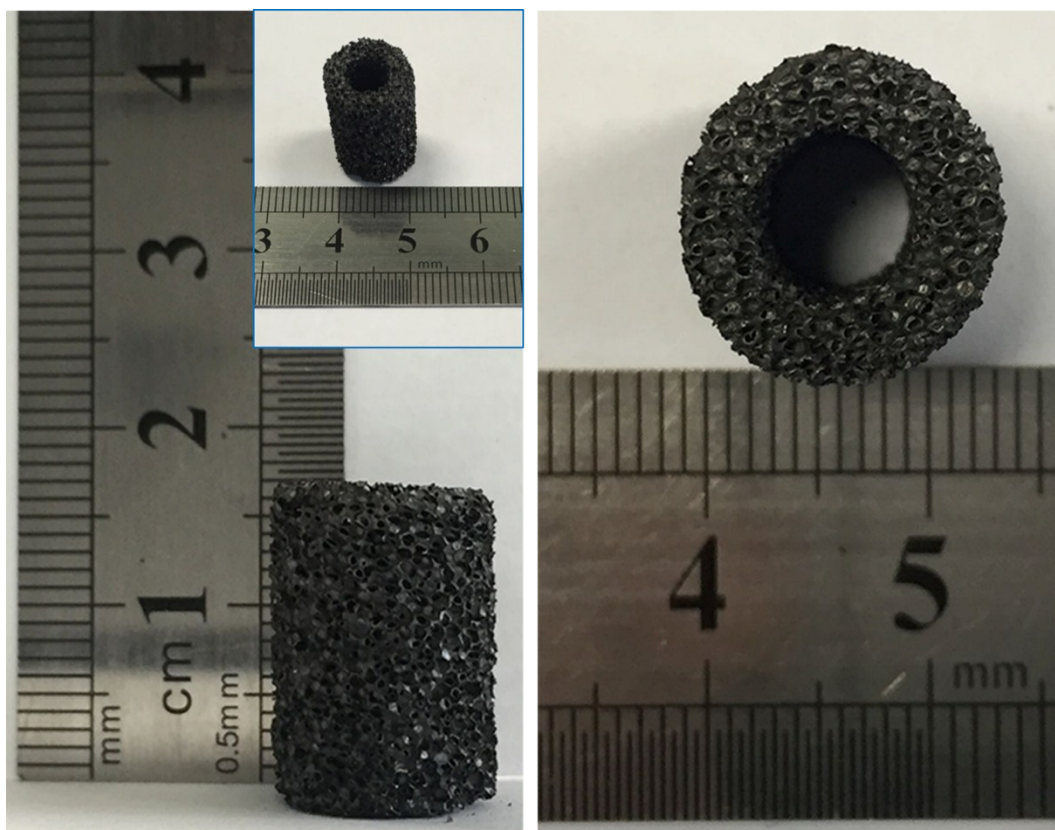

**Figure S14.** Photographs of the electrode used in actual experiment (left: side-view; right: top-view).

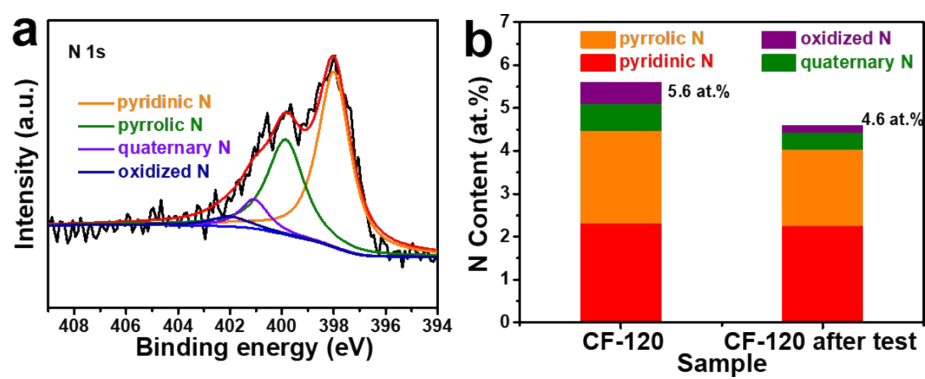

**Figure S15.** (a) The high-resolution XPS spectra of N 1s of CF-120 after 8 h test. (b) The content and types of N in CF-120 and CF-120 after 8 h test.
